# Supplementary figures and images for: The Population Dynamics and Parasitism Rates of Ceratitis capitata, Anastrepha fraterculus, and Drosophila suzukii in Non-Crop Hosts: Implications for the Management of Pest Fruit Flies
Source: MDPI journal article supplement (doi:10.3390/insects15010061), 2024-01-15

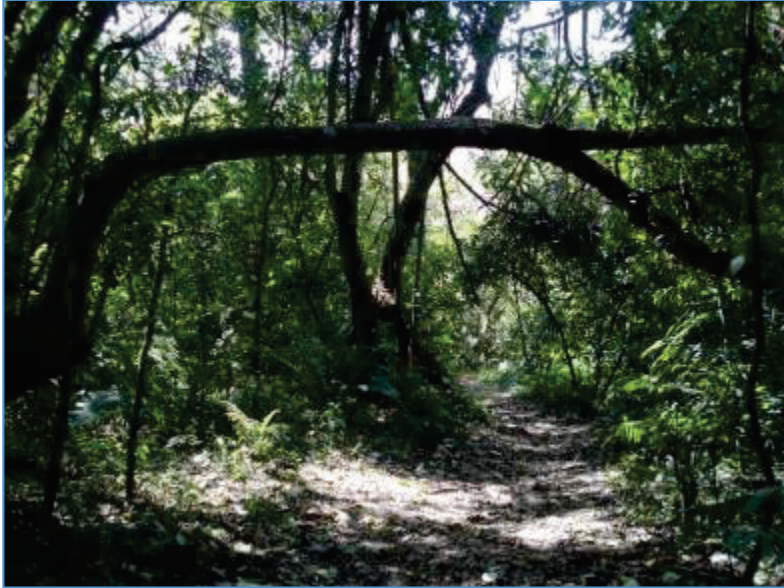

Supplement: s1 [file s1]

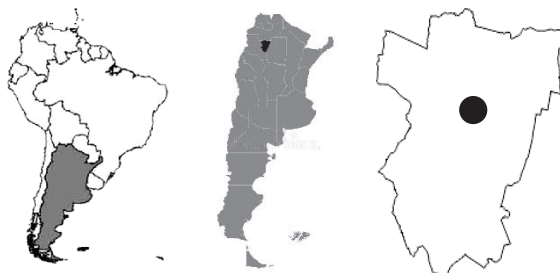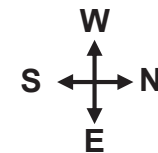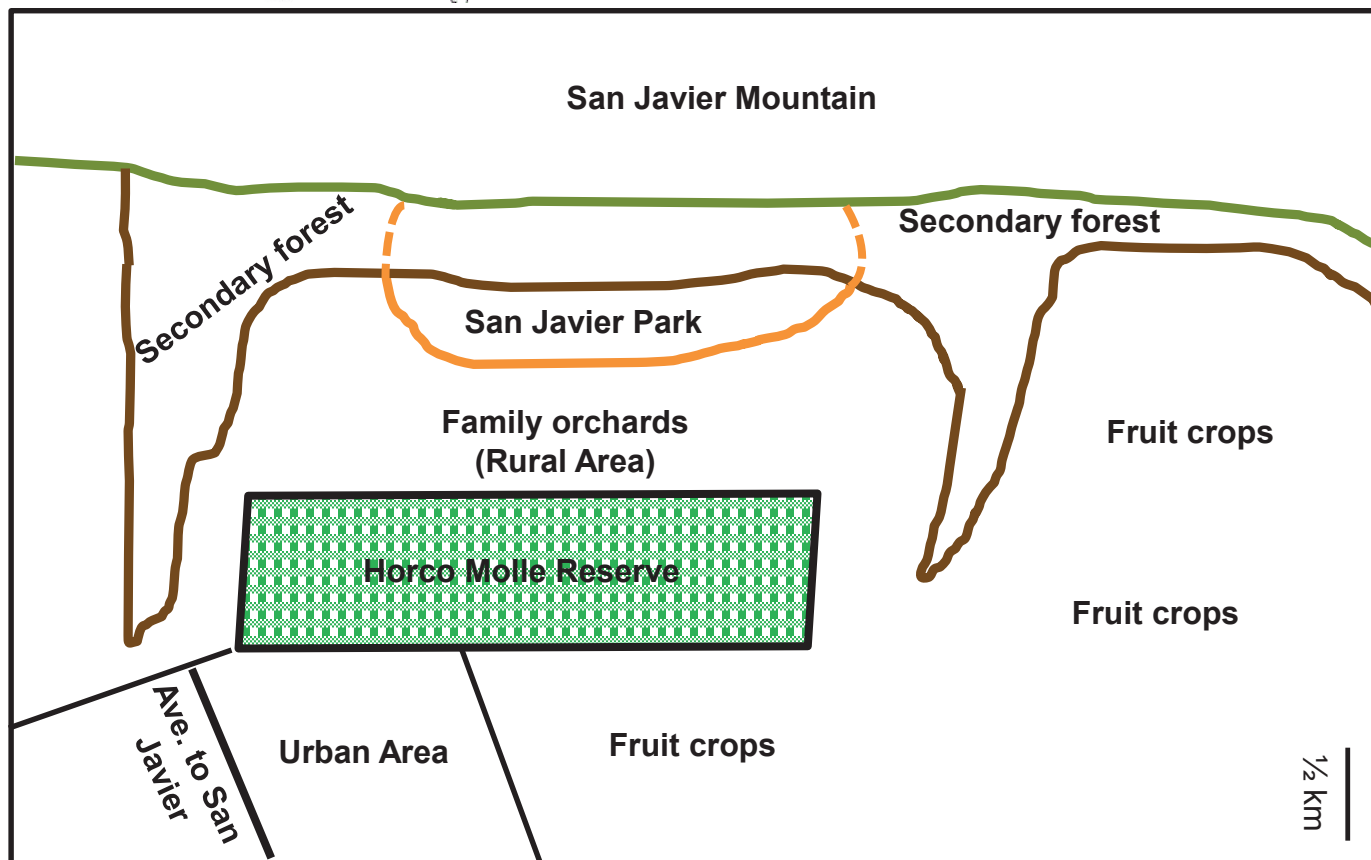

Supplement: s1 [file s1]
